# Supplementary material
Source: MDPI journal article supplement (https://www.mdpi.com/2073-4395/10/9/1228)
Supplement: s1 [file s1]

## **Suppl. Material**

### **Aluminum-Specific Upregulation of *GmALS3* in the Shoots of Soybeans: A Potential Biomarker for Managing Soybean Production in Acidic Soil Regions**

Raj Kishan Agrahari<sup>1</sup>, Yuriko Kobayashi<sup>1</sup>, Pankaj Borgohain<sup>2</sup>, Sanjib Kumar panda<sup>3</sup> and Hiroyuki Koyama<sup>1,\*</sup>

<sup>1</sup>Faculty of Applied Biological Sciences, Gifu University, Gifu 501-1193, Japan

<sup>2</sup>Department of Life Science and Bioinformatics, Assam University, Silchar 788011, India

<sup>3</sup>Department of Biochemistry, Central University of Rajasthan, Rajasthan 305817, India

\*Corresponding authors: Hiroyuki Koyama (koyama@gifu-u.ac.jp)

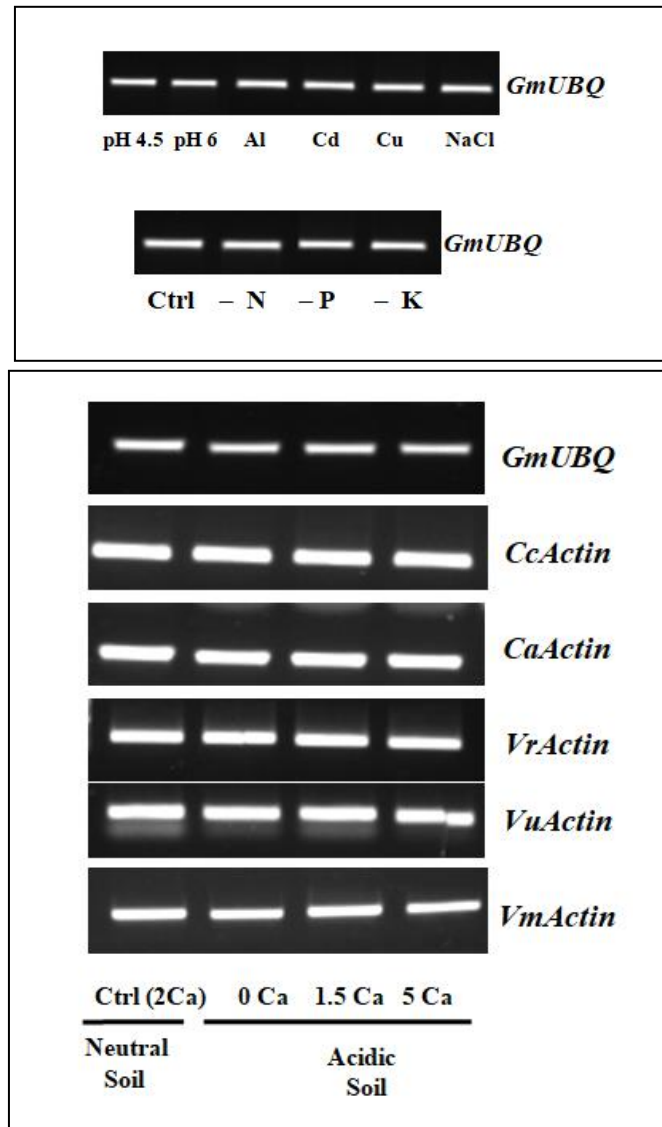

**Suppl Fig.S1:** Semi-quantitative PCR expression of internal standards used in this study to normalize the gene of interest in qRT-PCR. PCR products were separated by 3% agarose gel electrophoresis and visualized with GelRed staining.

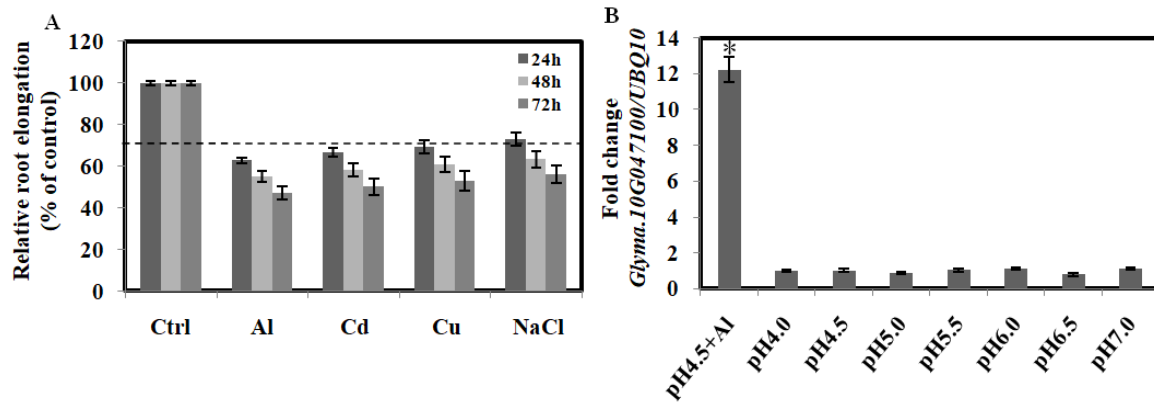

**Suppl Fig.S2:** Rhizotoxic ions effects on root growth and *GmALS3* expression in soybean. (A) Relative root elongation; soybean plants were exposed to rhizotoxic solutions containing  $\text{AlCl}_3$  (50  $\mu\text{M}$ ),  $\text{CdCl}_2$  (25  $\mu\text{M}$ ),  $\text{CuSO}_4$  (10  $\mu\text{M}$ ), or  $\text{NaCl}$  (75 mM) at pH 4.5 for 24, 48, and 72 h. Values are the means  $\pm$  SE (n=3). The dashed line indicates 30% inhibition of relative root elongation; (B) *GmALS3* expression in the shoots of soybean plants after exposure of the roots to nutrient solution with different pH for 24 h (+Al used as a positive control). The expression levels were quantified using real time PCR. *UBQ10* was used as an internal standard. Data are presented as the means  $\pm$  SE (n=3). Asterisks indicate a significant difference compared with the treatment solution (-Al different pH) (Student's *t*-test,  $P < 0.05$ ).

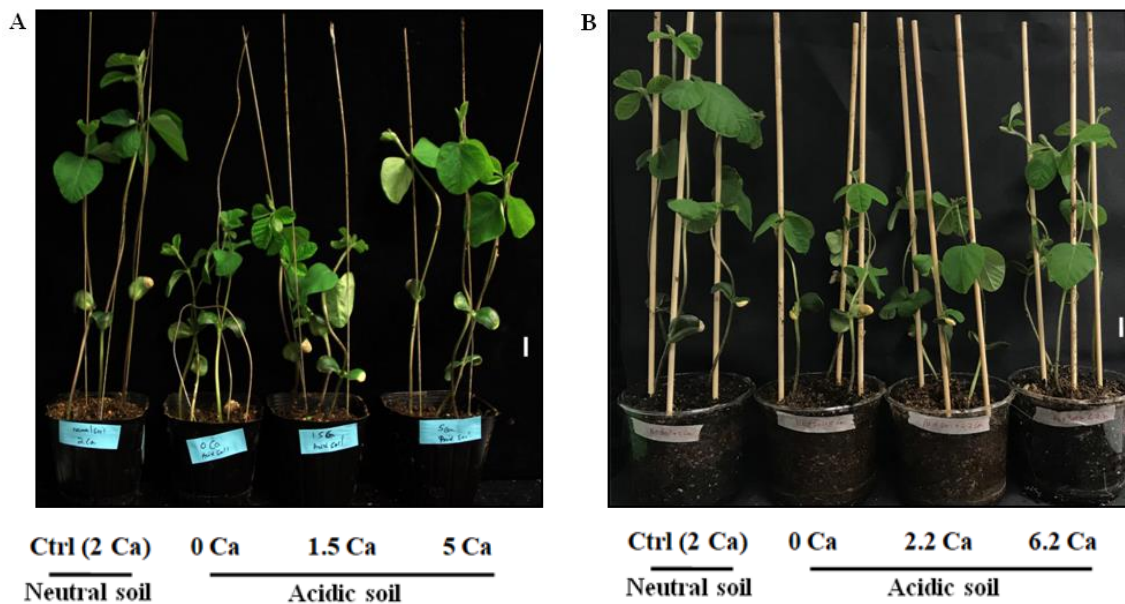

**Suppl Fig.S3:** Soybean shoots growth inhibition in neutral and acidic soil. (A) Shoot growth observed after two weeks of artificial soils (generally used for altering the color of hydrangea flowers in Japan). Plants were grown on neutral soil (addition of 2 g  $\text{CaCO}_3 \text{ kg}^{-1}$  soil) as a control and acidic soil with addition of different levels of liming (0, 1.5 and 5 g  $\text{CaCO}_3 \text{ kg}^{-1}$  soil) as treatment; (B) Shoot growth observed after 2 weeks of soybean grown in Indian field soils. Plants were grown on neutral soil (addition of 2 g  $\text{CaCO}_3 \text{ kg}^{-1}$  soil) as a control and acidic soil with addition of different levels of liming (0, 2.2, and 6.2 g  $\text{CaCO}_3 \text{ kg}^{-1}$  soil) as treatment. Scale bar =1cm.

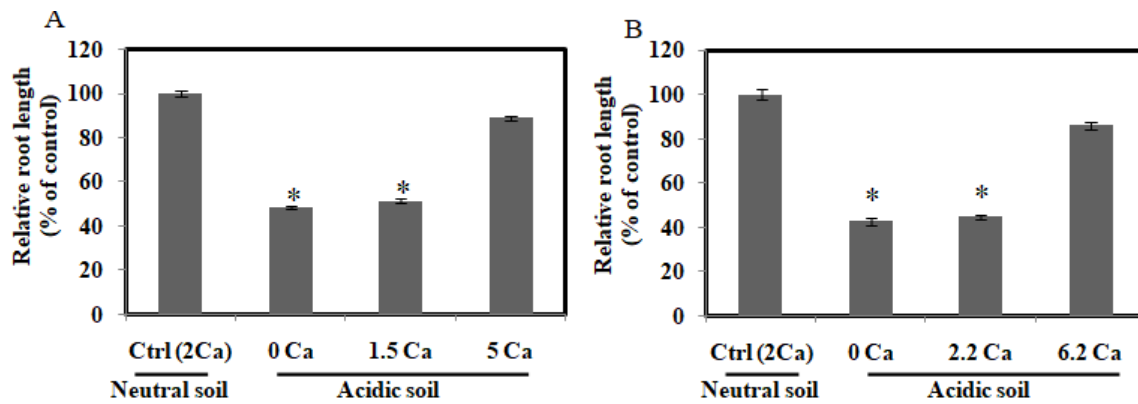

**Suppl. Fig. S4:** Soybean roots growth inhibition in neutral and acidic soil. (A) Relative root elongation of soybean in artificial soils. Plants were grown on neutral soil (addition of 2 g  $\text{CaCO}_3 \text{ kg}^{-1}$  soil) as a control and acidic soil with addition of different levels of liming (0, 1.5 and 5 g  $\text{CaCO}_3 \text{ kg}^{-1}$  soil) as treatment; (B) Relative root elongation of soybean grown in Indian field soils. Plants were grown on neutral soil (addition of 2 g  $\text{CaCO}_3 \text{ kg}^{-1}$  soil) as a control and acidic soil with addition of different levels of liming (0, 2.2, and 6.2 g  $\text{CaCO}_3 \text{ kg}^{-1}$  soil) as treatment. Mean and  $\pm$  SE ( $n=3$ ), asterisks indicate significant difference (Student's  $t$ -test,  $P<0.05$ ) compared to neutral soil (Ctrl).

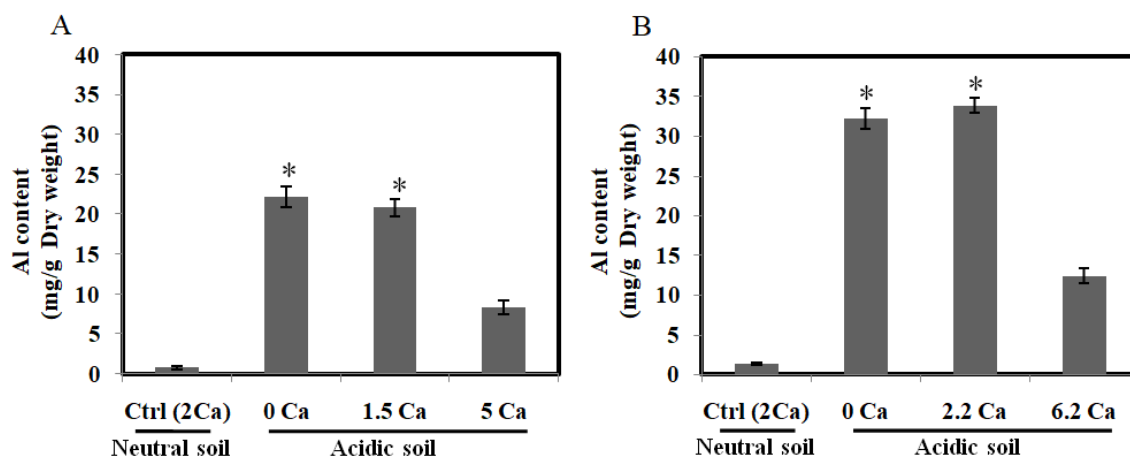

**Suppl. Fig.S5:** Al content of the roots of soybean plants grown in neutral and acidic soil. (A) Al contents of roots of soybean grown in artificial soils. Plants were grown for two weeks on neutral soil (addition of 2 g  $\text{CaCO}_3 \text{ kg}^{-1}$  soil) as a control and acidic soil with addition of different levels of liming (0, 1.5 and 5 g  $\text{CaCO}_3 \text{ kg}^{-1}$  soil) as treatment; (B) Al contents in the roots of soybean plants grown in Indian field soils. Plants were grown for 2 weeks in neutral soil (addition of 2 g  $\text{CaCO}_3 \text{ kg}^{-1}$  soil) as a control and acidic soil with addition of different amounts of lime (0, 2.2 and 6.2 g  $\text{CaCO}_3 \text{ kg}^{-1}$  soil) as treatments. Al concentration in the shoot was quantified using ICP-MS. Mean and  $\pm$  SE (n=3), asterisks indicate the significance of difference (Student's *t*-test  $P < 0.05$ ) compared to neutral soil (Ctrl).

Suppl. Table S1: Sequence information of primers used for qRT-PCR

| Gene ID                           |    | Primer Sequence (5'→3')   |
|-----------------------------------|----|---------------------------|
| <i>Glyma.10G047100 (GmALS3)</i>   | Fw | TGCGTGAAAATCACCAGAACA     |
| <i>Glyma.10G047100 (GmALS3)</i>   | Rv | GCAACAAGCCAAGAAATGAGAGA   |
| <i>Glyma.03G175800</i>            | Fw | TGTTGGCCAGCATTCTTCAC      |
| <i>Glyma.03G175800</i>            | Rv | GAACTCGAAATCACCGATTCA     |
| <i>Glyma.05G124000</i>            | Fw | GCTCATTTGCGCTTAATTACCA    |
| <i>Glyma.05G124000</i>            | Rv | CGTGGCACGTTAAATTCTCAG     |
| <i>Glyma.13G044600</i>            | Fw | TCCGGTACTTCCGAATTGAG      |
| <i>Glyma.13G044600</i>            | Rv | CCTGCCAAGTGAATCCTAGC      |
| <i>Glyma.03G222000</i>            | Fw | AAGGTTGGTGGGTCTGTTCA      |
| <i>Glyma.03G222000</i>            | Rv | TGGACATGGAATCTGGTTCA      |
| <i>Glyma.07G199900 (GmUBQ10)</i>  | Fw | GCAATTGGAGGATGGAAGGA      |
| <i>Glyma.07G199900 (GmUBQ10)</i>  | Rv | ACCACGAAGACGCAACACAA      |
| <i>Vigun01g155100 (VuALS3)</i>    | Fw | GCCAGCATTCTTCACCAAGG      |
| <i>Vigun01g155100 (VuALS3)</i>    | Rv | GGATGAATTTGAAATGAGGGAGTTG |
| <i>Vigun01g124700 (VuActin)</i>   | Fw | CGCACACACATTCCTTCTTTC     |
| <i>Vigun01g124700 (VuActin)</i>   | Rv | CCTTGACCATTCCAGTTCCA      |
| <i>Ca_11996 (CaALS3)</i>          | Fw | GCAACACCGAGACAAGCAAC      |
| <i>Ca_11996 (CaALS3)</i>          | Rv | GGTGAAGCCCCCTCCCATAA      |
| <i>Ca_22693 (CaActin)</i>         | Fw | GCCTGATGGACAGGTGATCAC     |
| <i>Ca_22693 (CaActin)</i>         | Rv | GGAACAGGACCTCTGGACATCT    |
| <i>MF377548 (CcALS3)</i>          | Fw | TTCTGAAGGGCATGGTGAA       |
| <i>MF377548 (CcALS3)</i>          | Rv | GCCCTGAGAATGGCAACAAC      |
| <i>109802430 (CcActin)</i>        | Fw | GGCATAATTGCCCTTGACT       |
| <i>109802430 (CcActin)</i>        | Rv | GAACCTCGGGACATCTGAAA      |
| <i>106757328 (VrALS3)</i>         | Fw | TGGTCGACAACACGAAAACA      |
| <i>106757328 (VrALS3)</i>         | Rv | AATGGCTTCCAATGGTGAGG      |
| <i>106757568 (VrActin)</i>        | Fw | AGCATGAAGGCTGGCAAGA       |
| <i>106757568 (VrActin)</i>        | Rv | CAACCAAACCAAATCGGTAACA    |
| <i>KT693208 (VmALS3)</i>          | Fw | ACTGGTCTGATAATGGGAGGTG    |
| <i>KT693208 (VmALS3)</i>          | Rv | GACTTTGGTTTGGAGCTGATAGG   |
| <i>JZ078743 (VmActin)</i>         | Fw | GTTCTGTTCCAGCCATCCAT      |
| <i>JZ078743 (VmActin)</i>         | Rv | GTGGTGCGACAACCTTGATT      |
| <i>Glyma.01G190700(GmNRAMP1a)</i> | Fw | TCAAGAAGGGTTGACCCCAG      |
| <i>Glyma.01G190700(GmNRAMP1a)</i> | Rv | CTCCTGAAGGTACTGCCCTG      |

|                                    |    |                       |
|------------------------------------|----|-----------------------|
| <i>Glyma.11G051500 (GmNRAMP1b)</i> | Fw | TCAAGGCAGGTTGATCCCAG  |
| <i>Glyma.11G051500 (GmNRAMP1b)</i> | Rv | TCTTGAAGGTACTGCCCTGC  |
| <i>Glyma.17G165200 (GmNRAMP2b)</i> | Fw | GATAGTGGTGGTCGGAGTCG  |
| <i>Glyma.17G165200 (GmNRAMP2b)</i> | Rv | AGGTCCCCCTCTAAGTTTCCA |

---

Fw= Forward primer, Rv= Reverse primer

Suppl. Table S2: Efficiency of designed primer pairs used for qRT-PCR amplification

| Gene                   | Tm( °C) | PCR efficiency (%) | Coefficient of determination(R2) |
|------------------------|---------|--------------------|----------------------------------|
| <i>GmALS3</i>          | 79.14   | 109.67             | 0.995                            |
| <i>Glyma.03G175800</i> | 79.03   | 102.43             | 0.992                            |
| <i>Glyma.05G124000</i> | 78.97   | 96.72              | 0.997                            |
| <i>Glyma.13G044600</i> | 78.62   | 98.38              | 0.989                            |
| <i>Glyma.03G222000</i> | 79.42   | 93.65              | 0.984                            |
| <i>GmUBQ10</i>         | 78.23   | 110.49             | 0.998                            |
| <i>CaALS3</i>          | 81.31   | 102.85             | 0.993                            |
| <i>CcALS3</i>          | 80.26   | 103.59             | 0.986                            |
| <i>VrALS3</i>          | 79.51   | 104.52             | 0.982                            |
| <i>VmALS3</i>          | 80.24   | 100.69             | 0.992                            |
| <i>VuALS3)</i>         | 79.61   | 104.28             | 0.997                            |
| <i>CaActin</i>         | 79.28   | 103.47             | 0.994                            |
| <i>CcActin</i>         | 81.61   | 112.31             | 0.992                            |
| <i>VrActin</i>         | 78.87   | 107.68             | 0.997                            |
| <i>VmActin</i>         | 81.11   | 106.24             | 0.993                            |
| <i>VuActin</i>         | 80.39   | 108.78             | 0.995                            |
| <i>GmNRAMP1a</i>       | 81.18   | 96.75              | 0.991                            |
| <i>GmNRAMP1b</i>       | 78.13   | 98.13              | 0.993                            |
| <i>GmNRAMP2b</i>       | 81.26   | 98.17              | 0.996                            |



**Table S3.** Changes in shoots, fresh, and dry weight of soybeans grown in artificial and natural soils

| Soil type          | Soil condition | CaCO <sub>3</sub><br>(g kg <sup>-1</sup> soil) | Fresh weight<br>(g)        | % of<br>inhibition | Dry weight<br>(g)          | % of<br>inhibition |
|--------------------|----------------|------------------------------------------------|----------------------------|--------------------|----------------------------|--------------------|
| Artificial         | Neutral Soil   | 2                                              | 3.136 ± 0.37               | 0                  | 0.623 ± 0.11               | 0                  |
|                    | Acidic Soil    | 0                                              | 1.723 ± 0.19*              | 45.06              | 0.252 ± 0.03*              | 59.55              |
|                    | Acidic Soil    | 1.5                                            | 1.761 ± 0.24*              | 43.85              | 0.261 ± 0.04*              | 58.10              |
|                    | Acidic Soil    | 5                                              | 2.812 ± 0.27 <sup>ns</sup> | 10.33              | 0.538 ± 0.06 <sup>ns</sup> | 13.64              |
| Field<br>(Natural) | Neutral Soil   | 2                                              | 4.061 ± 0.25               | 0                  | 0.718 ± 0.07               | 0                  |
|                    | Acidic Soil    | 0                                              | 2.131 ± 0.30*              | 47.52              | 0.271 ± 0.02*              | 62.25              |
|                    | Acidic Soil    | 2.2                                            | 2.174 ± 0.21*              | 46.46              | 0.283 ± 0.04*              | 60.58              |
|                    | Acidic Soil    | 6.2                                            | 3.462 ± 0.32 <sup>ns</sup> | 14.75              | 0.603 ± 0.03 <sup>ns</sup> | 16.01              |

Asterisks indicate significant differences (Student's *t*-test, *P*<0.05) compared to neutral soil (as a control), ns=not significant at 0.05 level. Mean ± SE; n=3).

**Table S4:** Changes in roots, fresh, and dry weight of soybeans grown in artificial and natural soils

| Soil type          | Soil condition | CaCO <sub>3</sub><br>(g kg <sup>-1</sup> soil) | Fresh weight<br>(g)        | % of<br>inhibition | Dry weight (g)              | % of<br>inhibition |
|--------------------|----------------|------------------------------------------------|----------------------------|--------------------|-----------------------------|--------------------|
| Artificial         | Neutral soil   | 2                                              | 0.613 ± 0.08               | 0                  | 0.039 ± 0.004               | 0                  |
|                    | Acidic Soil    | 0                                              | 0.224 ± 0.04*              | 63.45              | 0.018 ± 0.001*              | 53.84              |
|                    | Acidic Soil    | 1.5                                            | 0.229 ± 0.01*              | 62.64              | 0.020 ± 0.002*              | 48.71              |
|                    | Acidic Soil    | 5                                              | 0.554 ± 0.05 <sup>ns</sup> | 9.62               | 0.033 ± 0.001 <sup>ns</sup> | 15.38              |
| Field<br>(Natural) | Neutral soil   | 2                                              | 0.655 ± 0.04               | 0                  | 0.057 ± 0.002               | 0                  |
|                    | Acidic Soil    | 0                                              | 0.235 ± 0.03*              | 64.12              | 0.023 ± 0.003*              | 59.64              |
|                    | Acidic Soil    | 2.2                                            | 0.238 ± 0.07*              | 63.66              | 0.025 ± 0.002*              | 56.14              |
|                    | Acidic Soil    | 6.2                                            | 0.578 ± 0.05 <sup>ns</sup> | 11.75              | 0.046 ± 0.005 <sup>ns</sup> | 19.29              |

Asterisks indicate significant differences (Student's *t*-test, *P*<0.05) compared to neutral soil (as a control), ns=not significant at 0.05 level. Mean ± SE; n=3).
